# Supplementary material
Source: PubMed Central journal article supplement (PMC4811330)
Supplement: NIHMS768642-supplement-Supplemental_materials.pdf [file NIHMS768642-supplement-Supplemental_materials.pdf]

**Supplemental Table 1.** Biomarkers of iron and iodine status assessed, adult population data available for the current analysis, and laboratory method used, NHANES 2003–2006<sup>1</sup>.

| <b>Biomarker</b> | <b>Matrix</b> | <b>Survey cycle</b> | <b>Population</b> | <b>Laboratory method<sup>2</sup></b> | <b>Imprecision</b>            | <b>LOD<sup>3</sup></b> |
|------------------|---------------|---------------------|-------------------|--------------------------------------|-------------------------------|------------------------|
| FER              | Serum         | 2003–2006           | Females 20–49 y   | Roche IT                             | 3.0–8.0% at<br>58.7–432 µg/L  | 3 µg/L                 |
| sTfR             | Serum         | 2003–2006           | Females 20–49 y   | Roche IT                             | 1.6–3.9% at<br>2.19–7.15 mg/L | 0.5 mg/L               |
| Body iron        | Serum         | 2003–2006           | Females 20–49 y   | Calculated value <sup>4</sup>        | n/a                           | n/a                    |
| Iodine           | Urine         | 2003–2006           | 1/3 subset ≥20 y  | ICP-DRC-MS                           | 1.0–2.4% at<br>78.0–308 µg/L  | 1 µg/L                 |

<sup>1</sup> FER, ferritin; sTfR, soluble transferrin receptor; SI conversion factors are as follows: FER, ×2.247 (pmol/L); sTfR (no generally accepted conversion factor available); urine iodine, ×7.88 (nmol/L)

<sup>2</sup> IT, immunoturbidity; ICP-DRC-MS, inductively coupled plasma-direct reaction chamber-mass spectrometry

<sup>3</sup> LOD, limit of detection

<sup>4</sup> We calculated body iron by using the following formula<sup>1</sup>: body iron (mg/kg) =  $-\log_{10}(\text{sTfR} * 1000 / \text{ferritin}) - 2.8229 / 0.1207$ . The sTfR concentration in this formula represents an adjusted concentration<sup>2</sup> to make the Roche sTfR concentrations equivalent to the Flowers assay<sup>3</sup> used in the development of the body iron model: Flowers sTfR = 1.5 \* Roche sTfR + 0.35 mg/L

<sup>1</sup> Cook JD, Flowers CH, Skikne BS. The quantitative assessment of body iron. *Blood*. 2003;101:3359–64.

<sup>2</sup> Pfeiffer CM, Cook JD, Mei Z, Cogswell ME, Looker AC, Lacher DA. Evaluation of an automated soluble transferrin receptor (sTfR) assay on the Roche Hitachi analyzer and its comparison to two ELISA assays. *Clin Chim Acta*. 2007;382:112–6.

<sup>3</sup> Flowers CH, Skikne BS, Covell AM, Cook JF. The clinical measurement of serum transferrin receptor. *J Lab Clin Med*. 1989;114:368–77.

**Supplemental Table 2.** Sample sizes for biomarkers of iron and iodine status by sociodemographic and lifestyle factors for adults  $\geq 20$  y, NHANES 2003–2006<sup>1</sup>

|                             | Women 20–49 y of age |                         |           | Adults $\geq 20$ y of age |
|-----------------------------|----------------------|-------------------------|-----------|---------------------------|
|                             | Serum ferritin       | Serum sTfR <sup>2</sup> | Body iron | Urine iodine              |
| Age, y                      |                      |                         |           |                           |
| 20–39                       | 1780                 | 1761                    | 1758      | 1134                      |
| 40–49                       | 759                  | 752                     | 751       | n/a                       |
| 40–59                       | n/a                  | n/a                     | n/a       | 919                       |
| $\geq 60$                   | No data              | No data                 | No data   | 1013                      |
| Sex                         |                      |                         |           |                           |
| Males                       | No data              | No data                 | No data   | 1477                      |
| Females                     | 2539                 | 2513                    | 2509      | 1589                      |
| Race-ethnicity              |                      |                         |           |                           |
| Mexican American            | 589                  | 584                     | 582       | 637                       |
| Non-Hispanic black          | 573                  | 565                     | 565       | 627                       |
| Non-Hispanic white          | 1153                 | 1143                    | 1142      | 1551                      |
| Education                   |                      |                         |           |                           |
| <High school                | 566                  | 556                     | 554       | 882                       |
| High school                 | 564                  | 562                     | 561       | 731                       |
| >High school                | 1408                 | 1394                    | 1393      | 1449                      |
| PIR <sup>3</sup>            |                      |                         |           |                           |
| Low                         | 1087                 | 1076                    | 1073      | 1193                      |
| Medium                      | 571                  | 568                     | 568       | 770                       |
| High                        | 773                  | 762                     | 761       | 965                       |
| Supplement use <sup>4</sup> |                      |                         |           |                           |
| No                          | 1233                 | 1222                    | 1219      | 1467                      |
| Yes                         | 1304                 | 1289                    | 1288      | 1594                      |
| Smoking <sup>5</sup>        |                      |                         |           |                           |
| No                          | 1952                 | 1931                    | 1928      | 2176                      |
| Yes                         | 585                  | 580                     | 579       | 756                       |

## Online Supporting Material

| Alcohol consumption <sup>6</sup> |      |      |      |      |
|----------------------------------|------|------|------|------|
| No drinks                        | 778  | 771  | 770  | 1009 |
| <1 (not 0)                       | 1387 | 1370 | 1368 | 1489 |
| 1–<2                             | 90   | 89   | 89   | 192  |
| ≥2                               | 37   | 37   | 37   | 150  |
| BMI <sup>7</sup>                 |      |      |      |      |
| Underweight                      | 57   | 56   | 56   | 38   |
| Normal weight                    | 828  | 821  | 820  | 895  |
| Overweight                       | 696  | 689  | 687  | 1049 |
| Obese                            | 930  | 919  | 918  | 1043 |
| Physical activity <sup>8</sup>   |      |      |      |      |
| None reported                    | 848  | 835  | 834  | 1155 |
| 0–<500                           | 678  | 670  | 670  | 667  |
| 500–<1000                        | 320  | 316  | 315  | 372  |
| ≥1000                            | 644  | 644  | 642  | 758  |

<sup>1</sup> Data for iodine only available for a 1/3 subsample

<sup>2</sup> sTfR, soluble transferrin receptor

<sup>3</sup> PIR, family poverty-to-income ratio: 0–1.85 (low); >1.85–3.5 (medium); >3.5 (high)

<sup>4</sup> “Supplement user” defined as participant who reported taking any dietary supplement within the past 30 d

<sup>5</sup> “Smoker” defined by serum cotinine concentration >10 µg/L

<sup>6</sup> Alcohol consumption: calculated as average daily consumption [(quantity x frequency) / 365.25]; 1 drink ≈ 15 g ethanol

<sup>7</sup> BMI (kg/m<sup>2</sup>) definitions: <18.5 (underweight); 18.5–<25 (normal weight); 25–<30 (overweight); and ≥30 (obese)

<sup>8</sup> Physical activity: calculated as total metabolic equivalent task (MET)-min/wk from self-reported leisure time physical activities

**Supplemental Table 3.** Descriptive information of the respondent characteristics by factor for adults  $\geq 20$  y, NHANES 2003–2006

| Factor                           | Category                      | 2003–2006 <sup>1</sup> | Women 20–49 y<br>2003–2006 <sup>2</sup> | Iodine 1/3 sample<br>2003–2006 <sup>3</sup> |
|----------------------------------|-------------------------------|------------------------|-----------------------------------------|---------------------------------------------|
| Age, y                           | 20–39                         | 38.4                   | 63.7                                    | 38.4                                        |
|                                  | 40–59                         | 38.8                   | 36.3                                    | 38.8                                        |
|                                  | $\geq 60$                     | 22.8                   | 0                                       | 22.8                                        |
| Gender                           | Male                          | 48.0                   | 0                                       | 48.0                                        |
|                                  | Female                        | 52.0                   | 100                                     | 52.0                                        |
| Race-ethnicity                   | Mexican American              | 7.9                    | 9.6                                     | 7.87                                        |
|                                  | Non-Hispanic black            | 11.4                   | 13.7                                    | 11.4                                        |
|                                  | Non-Hispanic white            | 72                     | 66.4                                    | 70.9                                        |
|                                  | Other Hispanic                | 3.5                    | 4.2                                     | 3.8                                         |
|                                  | Other (including multiracial) | 5.4                    | 6.1                                     | 6.0                                         |
| Education                        | $\leq$ High school            | 44.2                   | 37.5                                    | 43.5                                        |
|                                  | $>$ High school               | 55.9                   | 62.5                                    | 56.5                                        |
| PIR <sup>4</sup>                 | Low                           | 29.3                   | 33.2                                    | 28.8                                        |
|                                  | Middle                        | 28.0                   | 26.3                                    | 28.0                                        |
|                                  | High                          | 42.7                   | 40.5                                    | 43.3                                        |
| Supplement use <sup>5</sup>      | No                            | 45.9                   | 48.0                                    | 44.9                                        |
|                                  | Yes                           | 54.1                   | 52.0                                    | 55.1                                        |
| Smoking status <sup>6</sup>      | No                            | 71.2                   | 73.0                                    | 72.4                                        |
|                                  | Yes                           | 28.9                   | 27.0                                    | 27.6                                        |
| Alcohol consumption <sup>7</sup> | No drinks                     | 29.4                   | 26.8                                    | 29.2                                        |
|                                  | $<1$ (not 0)                  | 56.8                   | 66.0                                    | 56.3                                        |
|                                  | $1-<2$                        | 7.9                    | 5.0                                     | 8.1                                         |
|                                  | $\geq 2$                      | 6.0                    | 2.2                                     | 6.4                                         |
| BMI <sup>8</sup>                 | Underweight                   | 1.8                    | 2.8                                     | NR                                          |
|                                  | Normal weight                 | 31.6                   | 38.9                                    | 31.7                                        |
|                                  | Overweight                    | 33.4                   | 24.8                                    | 33.2                                        |
|                                  | Obese                         | 33.3                   | 33.6                                    | 33.6                                        |
| Physical activity <sup>9</sup>   | None reported                 | 32.1                   | 27.9                                    | 33.7                                        |
|                                  | $0-<500$                      | 24.2                   | 27.9                                    | 23.1                                        |
|                                  | $500-<1000$                   | 14.0                   | 14.0                                    | 14.3                                        |
|                                  | $\geq 1000$                   | 29.7                   | 30.2                                    | 29.0                                        |

<sup>1</sup> Estimates provided are weighted percent (%) and apply to all adults  $\geq 20$  y based on the MEC sample<sup>2</sup> Estimates provided are weighted percent (%) and apply to the iron status indicators<sup>3</sup> Estimates provided are weighted percent (%) and apply to urine iodine<sup>4</sup> PIR, family poverty income ratio: 0–1.85 (low);  $>1.85-3.5$  (medium);  $>3.5$  (high)<sup>5</sup> “Supplement user” defined as participant who reported taking a dietary supplement within the past 30 d

## Online Supporting Material

<sup>6</sup> “Smoker” defined by serum cotinine concentration  $>10 \mu\text{g/L}$

<sup>7</sup> Alcohol consumption: average daily consumption [(quantity x frequency) / 365.25]; 1 drink  $\approx 15 \text{ g}$  ethanol

<sup>8</sup> BMI ( $\text{kg/m}^2$ ) definitions:  $<18.5$  (underweight);  $18.5\text{--}<25$  (normal weight);  $25\text{--}<30$  (overweight);  $\geq 30$  (obese)

<sup>9</sup> Physical activity: calculated as total metabolic equivalent task (MET)-min/wk from self-reported leisure time physical activities

**Supplemental Table 4.** *Beta* coefficients from chunk-wise modeling approach for biomarkers of iron and iodine status by sociodemographic and lifestyle variables for adults  $\geq 20$  y, NHANES 2003–2006<sup>1,2</sup>

| Variable                                          | Serum ferritin | Serum sTfR | Body iron | Urine iodine |
|---------------------------------------------------|----------------|------------|-----------|--------------|
| Age: continuous, every 10 y increase              |                |            |           |              |
| Model 1                                           | 0.12*          | 0.01       | 0.40*     | 0.08*        |
| Model 2                                           | 0.10*          | 0.02*      | 0.29*     | 0.08*        |
| Model 3                                           | 0.07*          | 0.02       | 0.22      | 0.06*        |
| Model 4                                           | n/a            | n/a        | n/a       | 0.11*        |
| Sex: males vs. females                            |                |            |           |              |
| Model 1                                           | No data        | No data    | No data   | 0.20*        |
| Model 2                                           | No data        | No data    | No data   | 0.21*        |
| Model 3                                           | No data        | No data    | No data   | 0.30*        |
| Model 4                                           | n/a            | n/a        | n/a       | -0.04        |
| Race-ethnicity <sup>3</sup>                       |                |            |           |              |
| MA vs. NHW                                        |                |            |           |              |
| Model 1                                           | -0.23*         | 0.04       | -0.94*    | 0.09*        |
| Model 2                                           | -0.17*         | 0.02       | -0.67     | 0.08         |
| Model 3                                           | -0.04          | -0.04      | 0.01      | 0.06         |
| Model 4                                           | n/a            | n/a        | n/a       | 0.04         |
| NHB vs. NHW                                       |                |            |           |              |
| Model 1                                           | -0.16*         | 0.24*      | -1.37*    | -0.12*       |
| Model 2                                           | -0.13*         | 0.22*      | -1.19*    | -0.13*       |
| Model 3                                           | -0.07          | 0.17*      | -0.81*    | -0.13*       |
| Model 4                                           | n/a            | n/a        | n/a       | -0.41*       |
| PIR <sup>4</sup> : continuous                     |                |            |           |              |
| Model 1                                           | 0.04*          | -0.02*     | 0.23*     | -0.02        |
| Model 2                                           | 0.02           | -0.02*     | 0.13      | -0.03*       |
| Model 3                                           | 0.02           | -0.02*     | 0.13*     | -0.04*       |
| Model 4                                           | n/a            | n/a        | n/a       | -0.02        |
| Education: $\leq$ high school vs. $>$ high school |                |            |           |              |
| Model 1                                           | -0.07          | 0.01       | -0.29     | 0.12*        |
| Model 2                                           | -0.02          | -0.03      | 0.00      | 0.07         |
| Model 3                                           | -0.05          | -0.03      | -0.12     | 0.07         |
| Model 4                                           | n/a            | n/a        | n/a       | 0.05         |
| Supplement use <sup>5</sup> : yes vs. no          |                |            |           |              |
| Model 1                                           | 0.11*          | -0.03      | 0.52*     | 0.13*        |
| Model 3                                           | 0.06           | -0.01      | 0.27      | 0.17*        |
| Model 4                                           | n/a            | n/a        | n/a       | 0.20*        |
| Smoking <sup>6</sup> : yes vs. no                 |                |            |           |              |
| Model 1                                           | -0.22*         | 0.11*      | -1.13*    | 0.08         |

## Online Supporting Material

|                                                       |                    |                     |                    |                     |
|-------------------------------------------------------|--------------------|---------------------|--------------------|---------------------|
| Model 3                                               | -0.22*             | 0.11*               | -1.15*             | 0.01                |
| Model 4                                               | n/a                | n/a                 | n/a                | 0.07                |
| Alcohol consumption <sup>7</sup> : continuous, ln + 1 |                    |                     |                    |                     |
| Model 1                                               | 0.37*              | -0.17*              | 1.87*              | -0.16*              |
| Model 3                                               | 0.28*              | -0.09*              | 1.28*              | -0.18*              |
| Model 4                                               | n/a                | n/a                 | n/a                | -0.11*              |
| BMI: continuous, ln                                   |                    |                     |                    |                     |
| Model 1                                               | 0.25*              | 0.33*               | -0.21              | 0.41*               |
| Model 3                                               | 0.31*              | 0.26*               | 0.22               | 0.32*               |
| Model 4                                               | n/a                | n/a                 | n/a                | -0.02               |
| Physical activity <sup>8</sup> : continuous, ln + 1   |                    |                     |                    |                     |
| Model 1                                               | 0.01               | -0.01               | 0.07*              | -0.01*              |
| Model 3                                               | 0.02*              | -0.00               | 0.08               | -0.00               |
| Model 4                                               | n/a                | n/a                 | n/a                | 0.00                |
| Sample size, <i>n</i>                                 |                    |                     |                    |                     |
| Model 2                                               | 2431               | 2406                | 2402               | 2924                |
| Model 3                                               | 2153               | 2130                | 2127               | 2499                |
| Model 4                                               | n/a                | n/a                 | n/a                | 2499                |
| <i>R</i> <sup>2</sup> value, %                        |                    |                     |                    |                     |
| Model 2                                               | 2 <sup>&amp;</sup> | 6 <sup>&amp;</sup>  | 2 <sup>&amp;</sup> | 5 <sup>&amp;</sup>  |
| Model 3                                               | 4 <sup>&amp;</sup> | 13 <sup>&amp;</sup> | 5 <sup>&amp;</sup> | 7 <sup>&amp;</sup>  |
| Model 4                                               | n/a                | n/a                 | n/a                | 41 <sup>&amp;</sup> |

<sup>1</sup> Model 1, simple linear regression; model 2, multiple linear regression by adjusting for sociodemographic variables; model 3, multiple linear regression by adjusting for sociodemographic and lifestyle variables; model 4 (for urine iodine only), multiple linear regression by adjusting for sociodemographic and lifestyle variables and urine creatinine; change in covariate was carried out while holding any other variables in the model constant

<sup>2</sup> For all biomarkers except body iron, the dependent variable was the log-transformed biomarker concentration; for body iron, the dependent variable was the untransformed estimate; ferritin (μg/L); sTfR (mg/L), soluble transferrin receptor; body iron (mg/kg); urine iodine (μg/L)

<sup>3</sup> MA, Mexican American; NHB, non-Hispanic black; NHW, non-Hispanic white

<sup>4</sup> PIR, family poverty income ratio

<sup>5</sup> “Supplement user” defined as participant who reported taking a dietary supplement within the past 30 d

<sup>6</sup> “Smoker” defined by serum cotinine concentration >10 μg/L

<sup>7</sup> Alcohol consumption: calculated as average daily consumption [(quantity x frequency) / 365.25]; 1 drink ≈ 15 g ethanol

<sup>8</sup> Physical activity: calculated as total metabolic equivalent task (MET)-min/wk from self-reported leisure time physical activities

\* Wald F *P*-value <0.05; *beta* coefficient is significantly different from zero

& Satterthwaite adjusted F *P*-value for chunk test <0.05; testing whether at least one *beta* coefficient for the set of variables in the chunk is significantly different from zero

**Supplemental Figure 1.** Estimated change in iron status biomarker concentrations with change in sociodemographic and lifestyle variables using data for adults  $\geq 20$  y, NHANES 2003–2006.

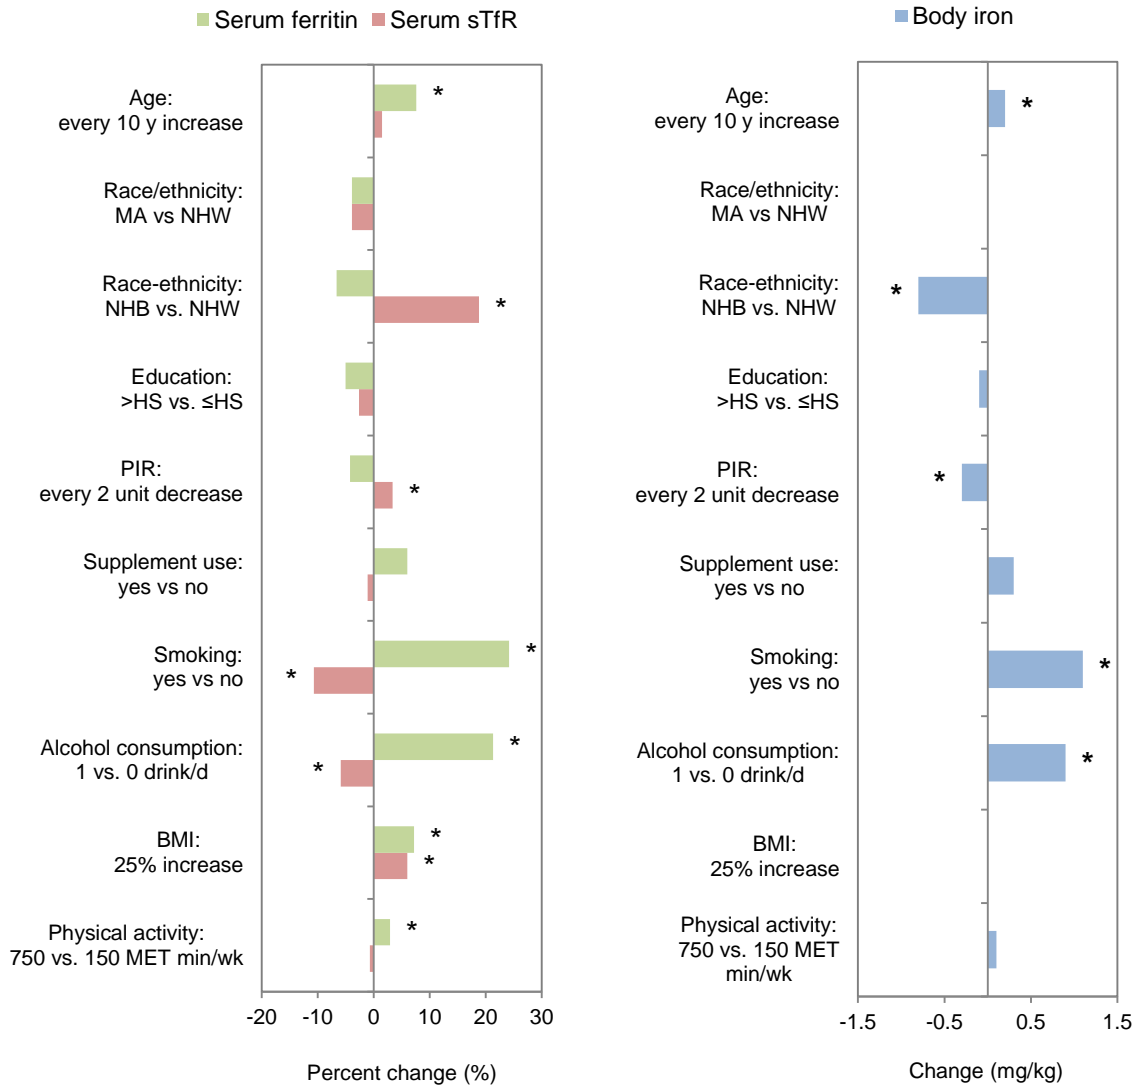

Changes derived from a multiple linear regression model adjusting for sociodemographic and lifestyle variables; change in a covariate was carried out while holding any other variables in the model constant.

Asterisk indicates significance ( $P < 0.05$ ).

HS, high school; MA, Mexican American; MET, metabolic equivalent task; NHB, non-Hispanic black; NHW, non-Hispanic white; PIR, poverty income ratio; TfR, soluble transferrin receptor.



**Supplemental Figure 2.** Estimated change in urine iodine concentrations with change in sociodemographic and lifestyle variables using data for adults  $\geq 20$  y, NHANES 2003–2006.

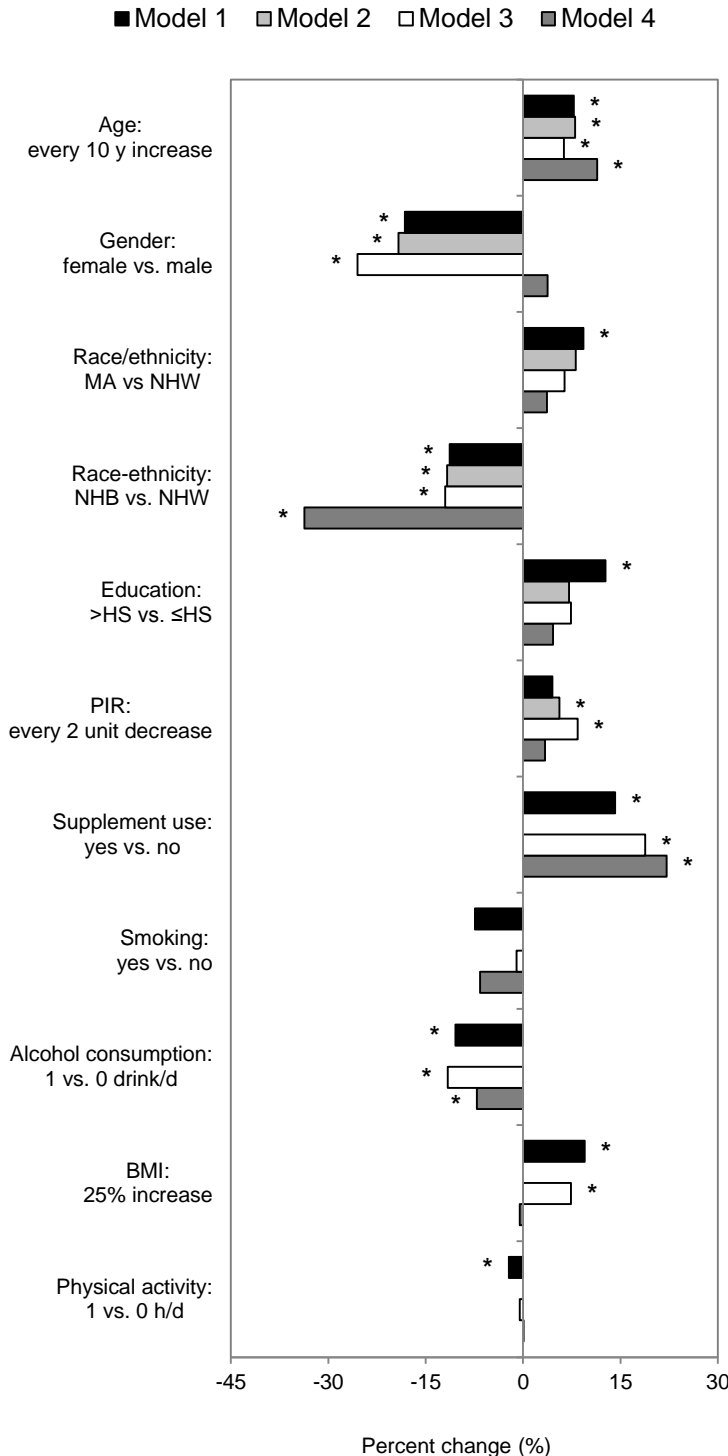

Change represents percent change (%); model 1, simple linear regression; model 2, multiple linear regression by adjusting for sociodemographic variables; model 3, multiple linear regression by adjusting for sociodemographic and lifestyle variables; model 4, multiple linear regression by adjusting for sociodemographic and lifestyle variables and urine creatinine; change in covariate was carried out while holding any other variables in the model constant.

An asterisk indicates significance ( $P < 0.05$ ).

HS, high school; MA, Mexican American; NHB, non-Hispanic black; NHW, non-Hispanic white; PIR, family poverty income ratio.

“Supplement user” defined as participant who reported taking a dietary supplement within the past 30 d.

“Smoker” defined by serum cotinine concentration  $>10 \mu\text{g/L}$ .

Alcohol consumption was calculated as average daily consumption [(quantity x frequency) / 365.25].

A 25% increase in BMI is comparable to a change from being normal weight to overweight.

Physical activity was calculated as total metabolic equivalent task (MET)-min/wk from self-reported leisure time physical activities.
